# Supplementary material
Source: publisher figshare collection journal article supplement (https://tandf.figshare.com/articles/dataset/_/16886874)
Supplement: Supplementary file 1 [file 1]

## Appendix

Experimental materials of Experiment 1 and 2. In the first sentence of each set of materials the first and second braces show the Chinese PO and DO prime sentence respectively. The second sentence shows the English translation for the corresponding PO and DO prime sentence. The third sentence shows the DO version of the target with English translation. All the prime sentences have the Cantonese and Chaoshanese recording version respectively.

| Set | Material in Experiment 1                                                                                                                 | Material in Experiment 2                                                                                                                |
|-----|------------------------------------------------------------------------------------------------------------------------------------------|-----------------------------------------------------------------------------------------------------------------------------------------|
| 1   | 警察递(了香蕉给拳击手)(给拳击手一条香蕉)The police passes {a banana to the boxer} { the boxer a banana}<br>牛仔递给小偷一个苹果 The cowboy passes the thief an apple | 厨师送(了球给牧师)(给牧师一个球) The chef gives {a ball to the priest} {the priest a ball}<br>牛仔递给小偷一个苹果 The cowboy passes the thief an apple         |
| 2   | 海盗借(了帽子给牧师)(给牧师一顶帽子) The pirate lends {a hat to the priest} {the priest a hat}<br>画家借给游泳选手一顶帽子 The artist lends the swimmer a hat        | 警察还(还了水壶给拳击手)(给拳击手一个水壶) The police returns {a jug to the boxer} {the boxer a jug}<br>画家借给游泳选手一顶帽子 The artist lends the swimmer a hat    |
| 3   | 警察还(还了水壶给拳击手)(给拳击手一个水壶) The police returns {a jug to the boxer} {the boxer a jug}<br>牧师还给士兵一顶帽子 The priest returns the soldier a hat     | 牛仔递(了香蕉给小偷)(给小偷一条香蕉) The cowboy passes {a banana to the thief} { the thief a banana}<br>牧师还给士兵一顶帽子 The priest returns the soldier a hat |
| 4   | 警察带(了苹果给医生)(给医生一个苹果) The police brings {an apple to the doctor} {the doctor an apple}<br>服务员带给小丑一个杯子 The waitress brings the clown a cup | 牛仔拿(了蛋糕给水手)(给水手一个蛋糕) The cowboy hands {a cake to the sailor} {the sailor a cake}<br>服务员带给小丑一个杯子 The waitress brings the clown a cup     |
| 5   | 画家卖(了书给小偷)(给小偷一本书) The artist sells {a book to the thief} {sell the thief a book}<br>教授卖给游泳选手一个杯子 The professor sells the swimmer a cup  | 海盗借(了帽子给牧师)(给牧师一顶帽子) The pirate lends {a hat to the priest} {the priest a hat}<br>教授卖给游泳选手一个杯子 The professor sells the swimmer a cup    |
| 6   | 海盗扔(了杯子给游泳选手)(给游泳选手一个杯子) The pirate throws {a cup to the swimmer} {the swimmer a cup}<br>海盗扔给水手一本书 The pirate throws the sailor a book   | 修女卖(了书给游泳选手)(给游泳选手一本书) The nun sells {a book to the swimmer} {the swimmer a book}<br>海盗扔给水手一本书 The pirate throws the sailor a book      |
| 7   | 牛仔拿(了蛋糕给水手)(给水手一个蛋糕) The cowboy hands {a cake to the sailor} {the sailor a cake}<br>牧师拿给拳击手一个苹果 The priest hands the boxer an apple      | 教授带(了帽子给厨师)(给厨师一顶帽子) The professor brings {a hat to the chef} {the chef a hat}<br>牧师拿给拳击手一个苹果 The priest hands the boxer an apple       |

|    |                                                                                                                                                            |                                                                                                                                                         |
|----|------------------------------------------------------------------------------------------------------------------------------------------------------------|---------------------------------------------------------------------------------------------------------------------------------------------------------|
| 8  | <p>厨师送(了球给牧师)(给牧师一个球) The chef gives {a ball to the priest} {the priest a ball}</p> <p>小偷送给拳击手一个蛋糕 The thief gives the boxer a cake</p>                    | <p>海盗扔(了杯子给游泳选手)(给游泳选手一个杯子) The pirate throws {a cup to the swimmer} {the swimmer a cup}</p> <p>小偷送给拳击手一个蛋糕 The thief gives the boxer a cake</p>        |
| 9  | <p>海盗拿(了蛋糕给小丑)(给小丑一个蛋糕) The pirate hands {a cake to the clown} {the clown a cake}</p> <p>小偷拿给水手一个球 The thief hands the sailor a ball</p>                   | <p>警察扔(了帽子给士兵)(给士兵一顶帽子) The police throws {a hat to the soldier} {the soldier a hat}</p> <p>小偷拿给水手一个球 The thief hands the sailor a ball</p>             |
| 10 | <p>画家卖给牧师一个水壶(了水壶给牧师)(给牧师一个水壶) The artist sells { a jug to the priest} {the priest a jug}</p> <p>教授卖给游泳选手一根香蕉 The professor sells the swimmer a banana</p> | <p>画家送(了枪给拳击手)(给拳击手一把枪) The artist gives {a gun to the boxer} {the boxer a gun}</p> <p>教授卖给游泳选手一根香蕉 The professor sells the swimmer a banana</p>        |
| 11 | <p>教授带(了帽子给厨师)(给厨师一顶帽子) The professor brings {a hat to the chef} {the chef a hat}</p> <p>服务员带给舞蹈员一个蛋糕 The waitress brings the dancer a cake</p>            | <p>修女还(了香蕉给拳击手)(给拳击手一条香蕉) The nun returns {a banana to the boxer} {the boxer a banana}</p> <p>服务员带给舞蹈员一个蛋糕 The waitress brings the dancer a cake</p>    |
| 12 | <p>画家送(了枪给拳击手)(给拳击手一把枪) The artist gives {a gun to the boxer} {the boxer a gun}</p> <p>小偷送给修女一顶帽子 The thief gives the nun a hat</p>                        | <p>牛仔递(了苹果给医生)(给医生一个苹果) The cowboy passes {an apple to the doctor} {the doctor an apple}</p> <p>小偷送给修女一顶帽子 The thief gives the nun a hat</p>            |
| 13 | <p>警察扔(了苹果给修女)(给修女一个苹果) The police throws { an apple to the nun} {the nun an apple}</p> <p>牛仔扔给士兵一把枪 The cowboy throws the soldier a gun</p>               | <p>海盗拿(了球给游泳选手)(给游泳选手一个球) The pirate hands {a ball to the swimmer} {the swimmer a ball}</p> <p>牛仔扔给士兵一把枪 The cowboy throws the soldier a gun</p>        |
| 14 | <p>牛仔递(了苹果给医生)(给医生一个苹果) The cowboy passes {an apple to the doctor} {the doctor an apple}</p> <p>服务员递给医生一条香蕉 The waitress passes the doctor a banana</p>    | <p>海盗借(了帽子给游泳选手)(给游泳选手一顶帽子) The pirate lends {a hat to the swimmer} { the swimmer a hat}</p> <p>服务员递给医生一条香蕉 The waitress passes the doctor a banana</p> |
| 15 | <p>海盗借(了帽子给游泳选手)(给游泳选手一顶帽子) The pirate lends {a hat to the swimmer} { the swimmer a hat}</p> <p>修女借给拳击手一条香蕉 The nun lends the boxer a banana</p>           | <p>画家卖给牧师一个水壶(了水壶给牧师)(给牧师一个水壶) The artist sells { a jug to the priest} {the priest a jug}</p> <p>修女借给拳击手一条香蕉 The nun lends the boxer a banana</p>       |
| 16 | <p>修女还(了香蕉给拳击手)(给拳击手一条香蕉) The nun returns {a banana to the boxer} {the boxer a banana}</p>                                                                 | <p>教授带(了水壶给士兵)(给士兵一个水壶) The professor brings {a jug to the soldier} {the soldier a jug}</p>                                                             |

|    |                                                                                                                                           |                                                                                                                                          |
|----|-------------------------------------------------------------------------------------------------------------------------------------------|------------------------------------------------------------------------------------------------------------------------------------------|
|    | 小偷还给士兵一个杯子 The thief returns the soldier a cup                                                                                            | 小偷还给士兵一个杯子 The thief returns the soldier a cup                                                                                           |
| 17 | 厨师送(了球给医生)(给医生一个球) The chef gives {a ball to the doctor} {the doctor a ball}<br>舞蹈员送给拳击手一条香蕉 The dancer gives the boxer a banana          | 警察带(了书给画家)(给画家一本书) The police brings {a book to the artist } {the artist a book}<br>舞蹈员送给拳击手一条香蕉 The dancer gives the boxer a banana     |
| 18 | 海盗借(了水壶给小丑)(给小丑一个水壶) The pirate lends {a jug to the clown} {the clown a jug}<br>修女借给牧师一条香蕉 The nun lends the priest a banana              | 警察扔(了苹果给修女)(给修女一个苹果) The police throws { an apple to the nun} {the nun an apple}<br>修女借给牧师一条香蕉 The nun lends the priest a banana         |
| 19 | 教授带(了水壶给士兵)(给士兵一个水壶) The professor brings {a jug to the soldier} {the soldier a jug}<br>牛仔带给小偷一个苹果 The cowboy brings the thief a apple    | 厨师送(了球给医生)(给医生一个球) The chef gives {a ball to the doctor} {the doctor a ball}<br>牛仔带给小偷一个苹果 The cowboy brings the thief a apple           |
| 20 | 修女卖(了书给游泳选手)(给游泳选手一本书) The nun sells {a book to the swimmer } {the swimmer a book}<br>教授卖给舞蹈员一个水壶 The professor sells the dancer a jug    | 修女还(了帽子给画家)(给画家一个帽子) The nun returns {a hat to the artist } {the artist a hat}<br>教授卖给舞蹈员一个水壶 The professor sells the dancer a jug       |
| 21 | 海盗拿(了球给游泳选手)(给游泳选手一个球) The pirate hands {a ball to the swimmer } {the swimmer a ball}<br>画家拿给士兵一个苹果 The artist hands the soldier an apple | 牛仔递(了蛋糕给拳击手)(给拳击手一个蛋糕) The cowboy passes {a cake to the boxer} {the boxer a cake}<br>画家拿给士兵一个苹果 The artist hands the soldier an apple    |
| 22 | 厨师递(了蛋糕给拳击手)(给拳击手一个蛋糕) The chef passes {a cake to the boxer} {the boxer a cake}<br>牛仔递给士兵一个苹果 The cowboy passes the soldier an apple      | 海盗拿(了蛋糕给小丑)(给小丑一个蛋糕) The pirate hands {a cake to the clown} {the clown a cake}<br>牛仔递给士兵一个苹果 The cowboy passes the soldier an apple      |
| 23 | 警察扔(了帽子给士兵)(给士兵一顶帽子) The police throws {a hat to the soldier} {the soldier a hat}<br>牛仔扔给教授一条香蕉 The cowboy throws the professor a banana  | 海盗借(了水壶给拳击手)(给拳击手一个水壶) The pirate lends {a jug to the boxer} {the boxer a jug}<br>牛仔扔给教授一条香蕉 The cowboy throws the professor a banana    |
| 24 | 修女还(了帽子给画家)(给画家一个帽子) The nun returns {a hat to the artist } {the artist a hat}<br>囚犯还给游泳选手一把枪 The prisoner returns the swimmer a gun      | 画家卖(了书给小偷)(给小偷一本书) The artist sells {a book to the thief } {sell the thief a book}<br>囚犯还给游泳选手一把枪 The prisoner returns the swimmer a gun |

|    |                                                                                                                                                   |                                                                                                                                              |
|----|---------------------------------------------------------------------------------------------------------------------------------------------------|----------------------------------------------------------------------------------------------------------------------------------------------|
| 25 | 警察拿(了香蕉给医生)(给医生一条香蕉)<br>The police hands {a banana to the doctor} {the doctor a banana}<br>囚犯拿给海盗一个水壶 The prisoner hands the pirate a jug         | 教授卖(了苹果给牧师)(给牧师一个苹果)<br>The professor sells {an apple to the priest} {the priest an apple}<br>囚犯拿给海盗一个水壶 The prisoner hands the pirate a jug |
| 26 | 警察扔(了蛋糕给小丑)(给小丑一个蛋糕)<br>The police throws {a cake to the clown} {the clown a cake}<br>海盗扔给士兵一把枪 The pirate throws the soldier a gun               | 警察带(了苹果给医生)(给医生一个苹果)<br>The police brings {an apple to the doctor} {the doctor an apple}<br>海盗扔给士兵一把枪 The pirate throws the soldier a gun    |
| 27 | 牛仔递(了香蕉给游泳选手)(给游泳选手一条香蕉) The cowboy passes {a banana to the swimmer} {the swimmer a banana}<br>服务员递给舞蹈员一个蛋糕 The waitress passes the dancer a cake | 警察扔(了枪给小丑)(给小丑一把枪) The police throws {a gun to the clown} {the clown a gun}<br>服务员递给舞蹈员一个蛋糕 The waitress passes the dancer a cake            |
| 28 | 修女还(了蛋糕给医生)(给医生一个蛋糕)<br>The nun returns {a cake to the doctor} {the doctor a cake}<br>厨师还给水手一顶帽子 The chef returns the sailor a hat                | 修女送(了杯子给士兵)(给士兵一个杯子)<br>The nun gives {a cup to the soldier} {the soldier a cup}<br>厨师还给水手一顶帽子 The chef returns the sailor a hat             |
| 29 | 修女送(了杯子给拳击手)(给拳击手一个杯子) The nun gives {a cup to the boxer} {the boxer a cup}<br>画家送给士兵一条香蕉 The artist gives the soldier a banana                   | 修女还(了蛋糕给医生)(给医生一个蛋糕)<br>The nun returns {a cake to the doctor} {the doctor a cake}<br>画家送给士兵一条香蕉 The artist gives the soldier a banana       |
| 30 | 海盗借(了水壶给拳击手)(给拳击手一个水壶) The pirate lends {a jug to the boxer} {the boxer a jug}<br>修女借给士兵一本书 The nun lends the soldier a book                      | 牛仔递(了香蕉给游泳选手)(给游泳选手一条香蕉) The cowboy passes {a banana to the swimmer} {the swimmer a banana}<br>修女借给士兵一本书 The nun lends the soldier a book    |
| 31 | 教授卖(了苹果给牧师)(给牧师一个苹果)<br>The professor sells {an apple to the priest} {the priest an apple}<br>画家卖给舞蹈员一把枪 The artist sells the dancer a gun        | 海盗拿(了香蕉给医生)(给医生一条香蕉)<br>The pirate hands {a banana to the doctor} {the doctor a banana}<br>画家卖给舞蹈员一把枪 The artist sells the dancer a gun      |
| 32 | 警察带(了书给画家)(给画家一本书) The police brings {a book to the artist} {the artist a book}<br>服务员带给拳击手一条香蕉 The waitress brings the boxer a banana            | 海盗借(了水壶给小丑)(给小丑一个水壶)<br>The pirate lends {a jug to the clown} {the clown a jug}<br>服务员带给拳击手一条香蕉 The waitress brings the boxer a banana       |
