# Supplementary material
Source: publisher figshare collection journal article supplement (https://tandf.figshare.com/articles/dataset/_/16886874)
Supplement: Supplementary file 2 [file 1]

## supplementary materials

### Experiment 1

**Table 1.**

**The lmer analysis of cross-linguistic priming from Chaoshanese to Mandarin**

| Random effects:                                   |             |            |         |          |
|---------------------------------------------------|-------------|------------|---------|----------|
| Groups                                            | Name        | Variance   | SD      |          |
| Subject                                           | (Intercept) | 0.23       | 0.47    |          |
| Item                                              | (Intercept) | 0.10       | 0.31    |          |
| Number of observations:698, Subject: 44; Item, 32 |             |            |         |          |
| Fixed effects:                                    |             |            |         |          |
|                                                   | Estimate    | Std. Error | z value | Pr(> z ) |
| (Intercept)                                       | 0.75        | 0.12       | 6.01    | <.001    |

**Table 2.**

**The lmer analysis of cross-linguistic priming from Cantonese to Mandarin**

| Random effects:                                   |             |            |         |          |
|---------------------------------------------------|-------------|------------|---------|----------|
| Groups                                            | Name        | Variance   | SD      |          |
| Subject                                           | (Intercept) | 0.24       | 0.50    |          |
| Item                                              | (Intercept) | 0.06       | 0.24    |          |
| Number of observations:693, Subject: 44; Item, 32 |             |            |         |          |
| Fixed effects:                                    |             |            |         |          |
|                                                   | Estimate    | Std. Error | z value | Pr(> z ) |
| (Intercept)                                       | 0.65        | 0.12       | 5.42    | <.001    |

## Experiment 2

**Table 3.**

**The lmer analysis of cross-linguistic priming from Chaoshanese to Mandarin**

| Random effects:                                     |             |            |         |          |
|-----------------------------------------------------|-------------|------------|---------|----------|
| Groups                                              | Name        | Variance   | SD      |          |
| Subject                                             | (Intercept) | 0.50       | 0.71    |          |
| Item                                                | (Intercept) | 0.29       | 0.18    |          |
| Number of observations: 1002, Subject: 64; Item, 32 |             |            |         |          |
| Fixed effects:                                      |             |            |         |          |
|                                                     | Estimate    | Std. Error | z value | Pr(> z ) |
| (Intercept)                                         | 0.15        | 0.07       | 2.17    | 0.03     |

**Table 4.**

**The lmer analysis of cross-linguistic priming from Cantonese to Mandarin**

| Random effects:                                    |             |            |         |          |
|----------------------------------------------------|-------------|------------|---------|----------|
| Groups                                             | Name        | Variance   | SD      |          |
| Subject                                            | (Intercept) | 0.08       | 0.13    |          |
| Item                                               | (Intercept) | 0.05       | 0.22    |          |
| Number of observations:1003, Subject: 64; Item, 32 |             |            |         |          |
| Fixed effects:                                     |             |            |         |          |
|                                                    | Estimate    | Std. Error | z value | Pr(> z ) |
| (Intercept)                                        | 0.15        | 0.12       | 2.07    | 0.04     |

## Combined analysis of Experiments 1 and 2

**Table 5.**

**The lmer analysis of translation-equivalent boost effect after the Chaoshanese prime**

| Random effects:                                      |             |            |         |          |
|------------------------------------------------------|-------------|------------|---------|----------|
| Groups                                               | Name        | Variance   | SD      |          |
| Subject                                              | (Intercept) | 0.14       | 0.18    |          |
| Item                                                 | (Intercept) | 0.03       | 0.16    |          |
|                                                      | Language    | 0.03       | 0.06    |          |
| Number of observations: 1700, Subject: 108; Item, 32 |             |            |         |          |
| Fixed effects:                                       |             |            |         |          |
|                                                      | Estimate    | Std. Error | z value | Pr(> z ) |
| (Intercept)                                          | 0.43        | 0.05       | 8.06    | <.001    |
| Language                                             | 0.55        | 0.15       | 3.66    | <.001    |

**Table 6.**

**The lmer analysis of translation-equivalent boost effect after the Cantonese prime**

| Random effects:                                      |             |            |         |          |
|------------------------------------------------------|-------------|------------|---------|----------|
| Groups                                               | Name        | Variance   | SD      |          |
| Subject                                              | (Intercept) | 0.003      | 0.06    |          |
| Item                                                 | (Intercept) | 0.05       | 0.22    |          |
|                                                      | Language    | 0.05       | 0.22    |          |
| Number of observations: 1696, Subject: 108; Item, 32 |             |            |         |          |
| Fixed effects:                                       |             |            |         |          |
|                                                      | Estimate    | Std. Error | z value | Pr(> z ) |
| (Intercept)                                          | 0.38        | 0.07       | 5.88    | <.001    |
| Language                                             | 0.45        | 0.11       | 4.12    | <.001    |
